# Supplementary material
Source: Springer Nature journal article supplement (https://www.springermedizin.de/resource/supplementary/12873_2010_106_MOESM1_ESM.pdf/9431426)

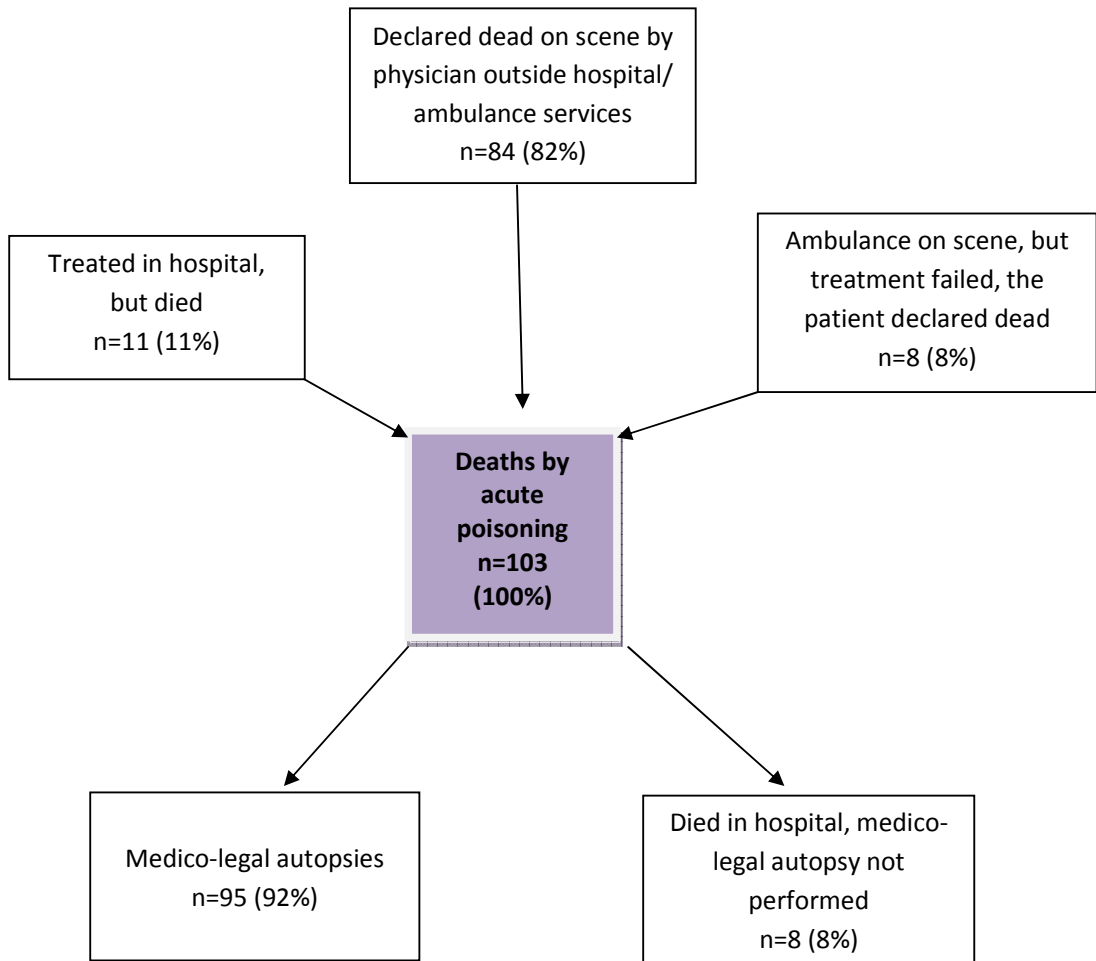

Supplement: MOESM1 [file 9431426]
